# Supplementary material for: Porous LiMn2O4 microspheres as durable high power cathode materials for lithium ion batteries
Source: Royal Society of Chemistry journal article supplement (doi:10.1039/c3ta11563a), 2013-01-01
Supplement: c3ta11563a.pdf [file c3ta11563a.pdf]

# Porous $\text{LiMn}_2\text{O}_4$ microspheres as durable high power cathode materials for lithium ion batteries

Yuanfu Deng,<sup>\*,[a],[b]</sup> Yubo Zhou,<sup>[b],[c]</sup> Zhicong Shi,<sup>[b]</sup> Xue Zhou,<sup>[a]</sup> Xie Quan<sup>[c]</sup> and Guohua Chen<sup>\*,[b],[c],[d]</sup>

<sup>[a]</sup> the Key Laboratory of Fuel Cell Technology of Guangdong Province, School of Chemistry and Chemical Engineering, South China University of Technology, Guangzhou, 510640, China;

<sup>[b]</sup> Center for Green Products and Processing Technologies, Guangzhou HKUST Fok Ying Tung Research Institute, Guangzhou 511458, China;

<sup>[c]</sup> State Key Laboratory of Fine Chemicals, School of Chemical Engineering, Dalian University of Technology, Dalian 116023, China;

<sup>[d]</sup> Department of Chemical and Biomolecular Engineering, The Hong Kong University of Science and Technology, Hong Kong, China.

\*Corresponding author. Tel & Fax: + 86 20 34685679

E-mail address: [chyfdeng@scut.edu.cn](mailto:chyfdeng@scut.edu.cn); [kechengh@ust.hk](mailto:kechengh@ust.hk).

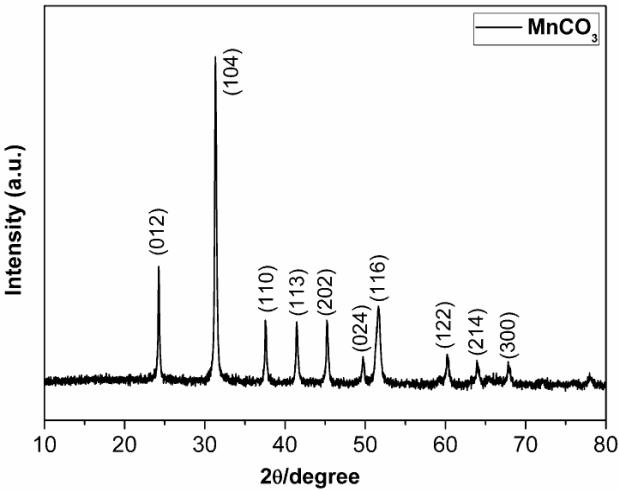

Fig. S1. The XRD pattern of the  $\text{MnCO}_3$ .

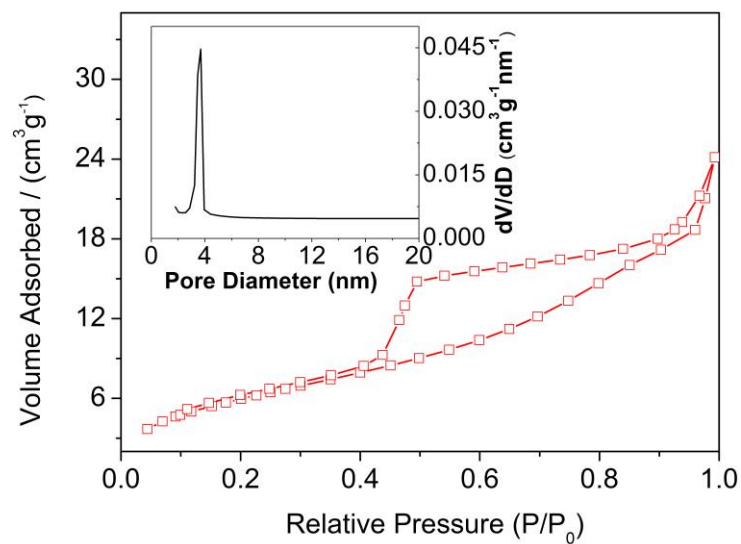

Fig. S2. The N<sub>2</sub> adsorption-desorption isotherms of the porous MnCO<sub>3</sub> microspheres.

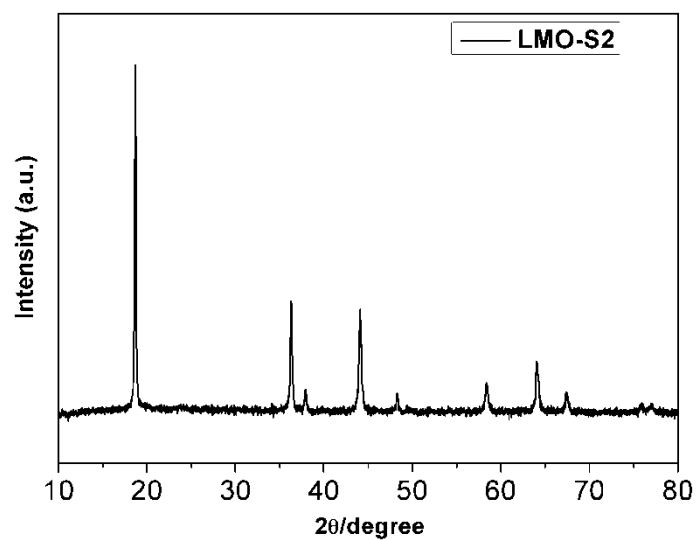

Fig. S3. The XRD pattern of the  $\text{LiMn}_2\text{O}_4$  obtained from the reaction of commercial  $\text{MnCO}_3$  with eutectic molten lithium salt.

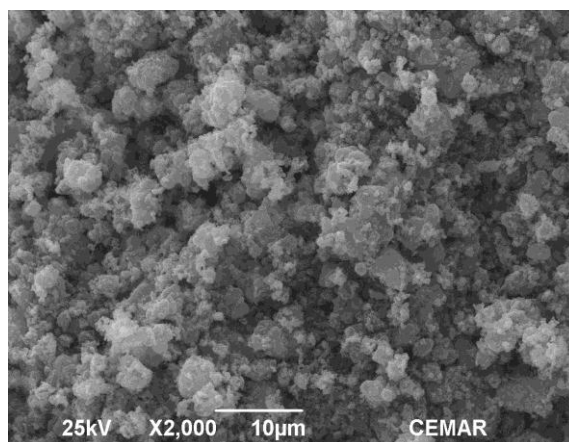

Fig. S4. The SEM image of the  $\text{LiMn}_2\text{O}_4$  obtained from the reaction of commercial  $\text{MnCO}_3$  with eutectic molten lithium salt.

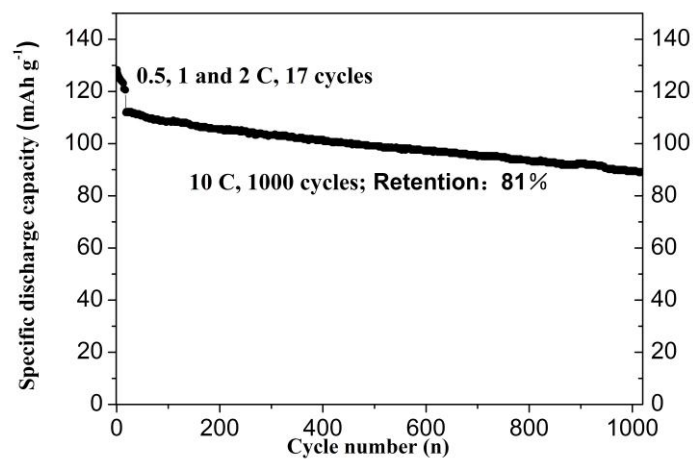

Fig. S5. The cycle performances of the LMO-S1 electrode at 10 C.

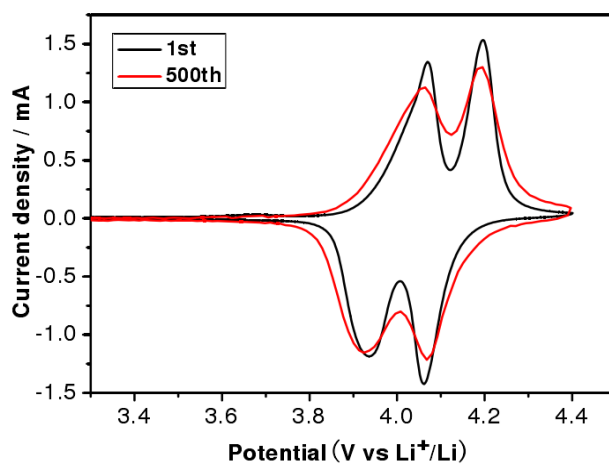

Fig. S6. The CV curves of the LMO-S1 electrode for the 1<sup>st</sup> and 500<sup>th</sup> cycles at 2 C.

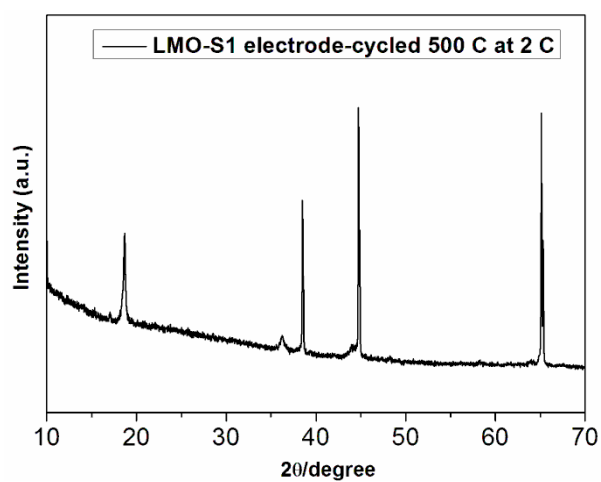

Fig. S7. The XRD pattern of the LMO-S1 electrode after the 500<sup>th</sup> cycle at 2 C.

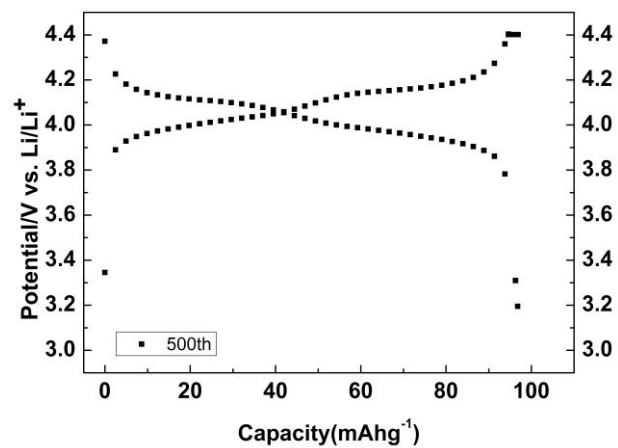

Fig. S8. The charge/discharge curves of the LMO-S1 electrode after the 500<sup>th</sup> cycle at 2 C.

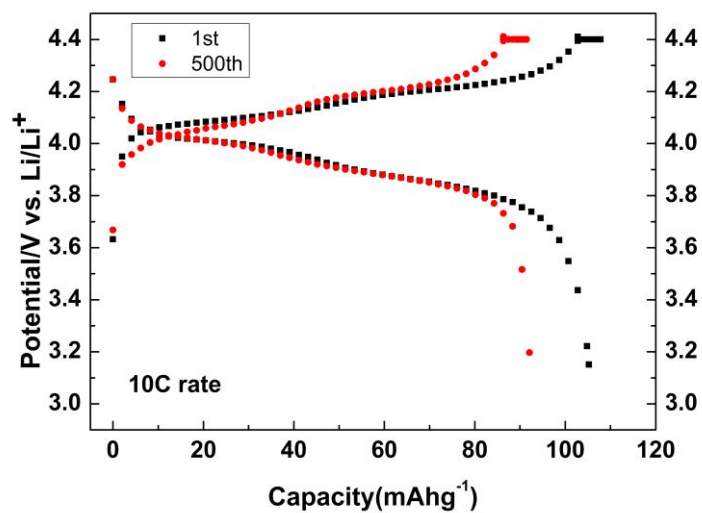

Fig. S9. The charge/discharge curves of the LMO-S1 electrode after the 1<sup>st</sup> and 500<sup>th</sup> cycles at 10 C.

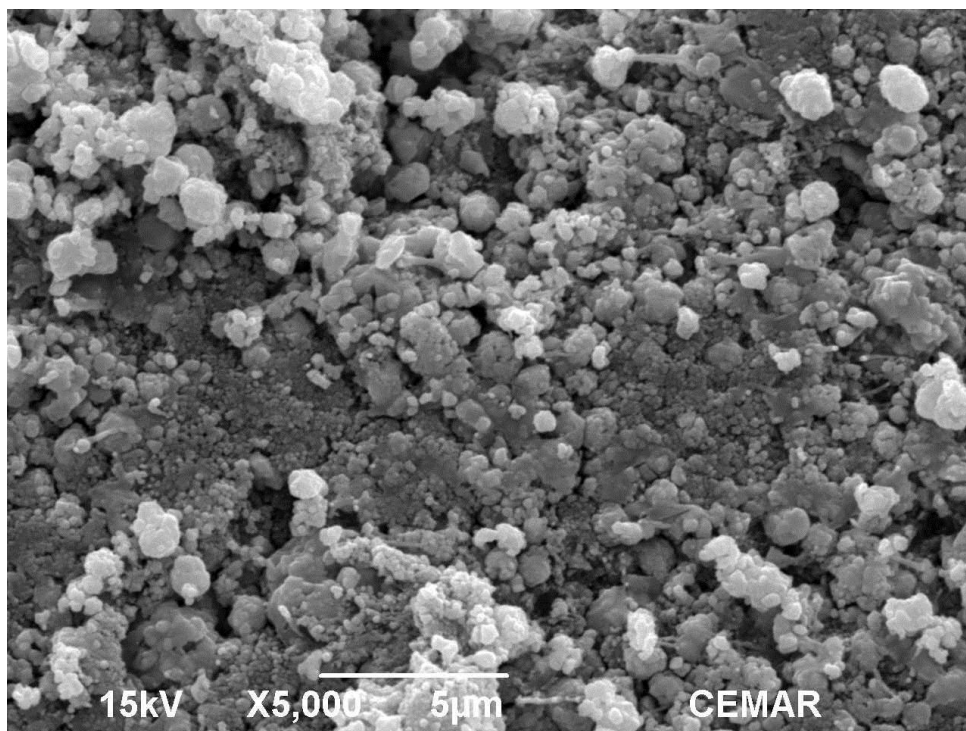

Fig. S10. The SEM image of the LMO-S1 electrode after 500 cycles at 2 C.
